# Supplementary material for: Characterizing the interactions between humic matter and calcium ions during water softening by cation-exchange resins
Source: Royal Society of Chemistry journal article supplement (doi:10.1039/c6ra22113k), 2016-01-01
Supplement: c6ra22113k1.pdf [file c6ra22113k1.pdf]

## Supplementary Information

# Characterizing the Interactions between Humic Matter and Calcium Ions during Water Softening by Cation-Exchange Resins

Bin Dong<sup>a#</sup>, Ying Xu<sup>a#\*</sup>, Danni Shen<sup>a</sup>, Xiaohu Dai<sup>a\*</sup>, Senming Lin<sup>b</sup>

<sup>a</sup> State Key Laboratory of Pollution Control and Resource Reuse, School of Environmental Science and Engineering, Tongji University, Shanghai, 200092, China

<sup>b</sup> Engineering Technology Branch, Petroleum Administrative Bureau, China National Petroleum Corporation, Karamay, Xinjiang, 834000, China

**\* Corresponding authors:**

Xiaohu Dai and Ying Xu

1239 Siping Road, Shanghai 200092, PR China

Tel.: +86 21 65981794; fax: +86 21 65983602.

E-mail address: [assassinxu@sina.cn](mailto:assassinxu@sina.cn) or [daixiaohu@tongji.edu.cn](mailto:daixiaohu@tongji.edu.cn)

**Text S1. Resin Pretreatment.**

The resins were subjected to wash by 10 bed volumes of 1M HCl and 1M NaOH, respectively in fixed-bed column runs in order to remove residual impurities. After washing resins with acid and base, distilled water was passed through the column to reach neutral pH in the effluent. The effluent flow rate was adjusted to 5 mL/min using a constant-flow pump to provide sufficient contact time between resin and solution. After column wash, the resins were transferred to a Soxhlet apparatus to be extracted with methanol for 8 hours for removing organic residues.

**Table S1.** Basic parameters of the cation exchange resins

| Parameters                                     | D113           |
|------------------------------------------------|----------------|
| Type                                           | Macroporous    |
| Type of the matrix                             | Polyacrylic    |
| Cross-linker                                   | Divinylbenzene |
| Moisture (%)                                   | 55             |
| Total exchange capacity (mmol/g)               | 10.8           |
| Average bead diameter (315-125 $\mu\text{m}$ ) | $\geq 96$      |

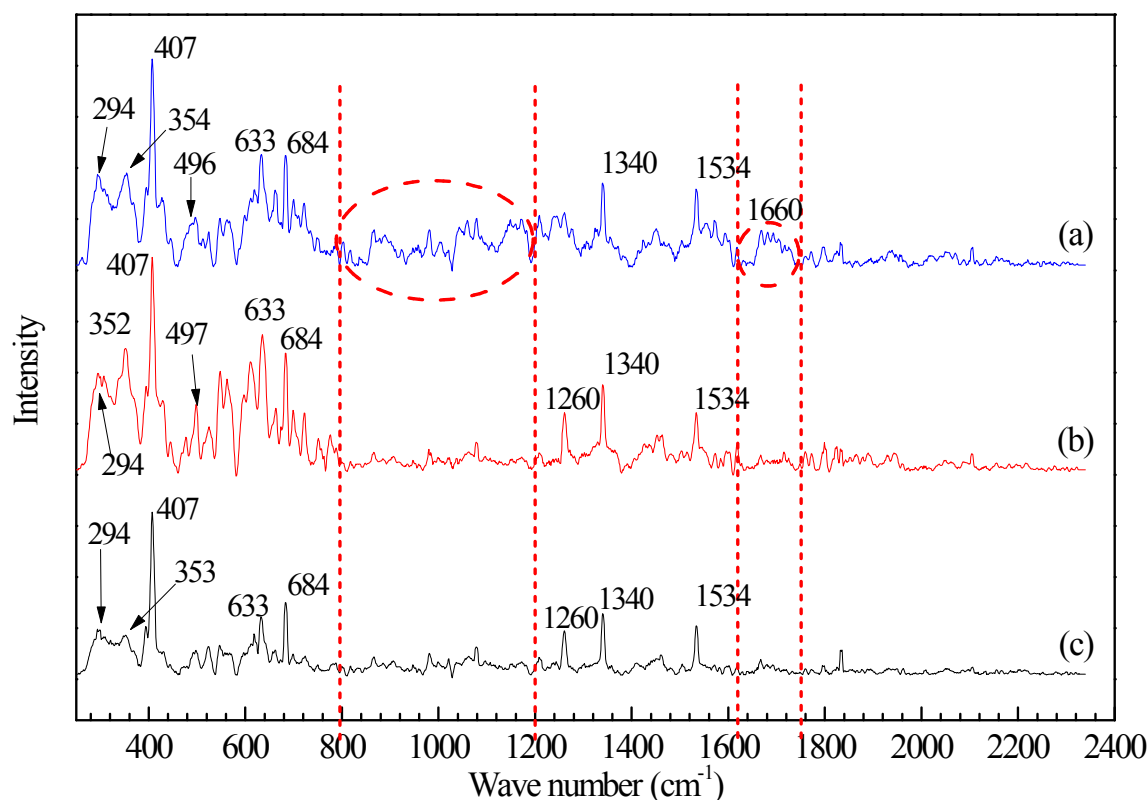

**Figure S1.** Raman spectrums of three resins: (a) CER-HM/Ca; (b) CER-Ca; (c) CER-Na

In the Figure S1, C=N bond of the Pyrrolines and Oxazolines is from the HM at 1645-1695  $\text{cm}^{-1}$ , and the 1660  $\text{cm}^{-1}$  from the spectrum of CER-HM/Ca was in the ranges. It is indicated that the HM was deposited on the surface of the resins. C-O stretching vibration of the unidentate carboxylate occurs in the range 1260-1420  $\text{cm}^{-1}$ , the 1260  $\text{cm}^{-1}$  was found in both of the spectrums of CER-Ca and CER-Na, while it disappeared in the spectrums of CER-HM/Ca. These results suggest that HM could react with unidentate carboxylate. More importantly, the aromatic carboxylic acids and  $-(\text{NO}_2)\text{-Ca-O-}$  bridging can be found by the ranges 900-1000  $\text{cm}^{-1}$  and 1000-1200  $\text{cm}^{-1}$ , respectively. These results indicate that Ca ion can be as a bridge between HM and CERs.

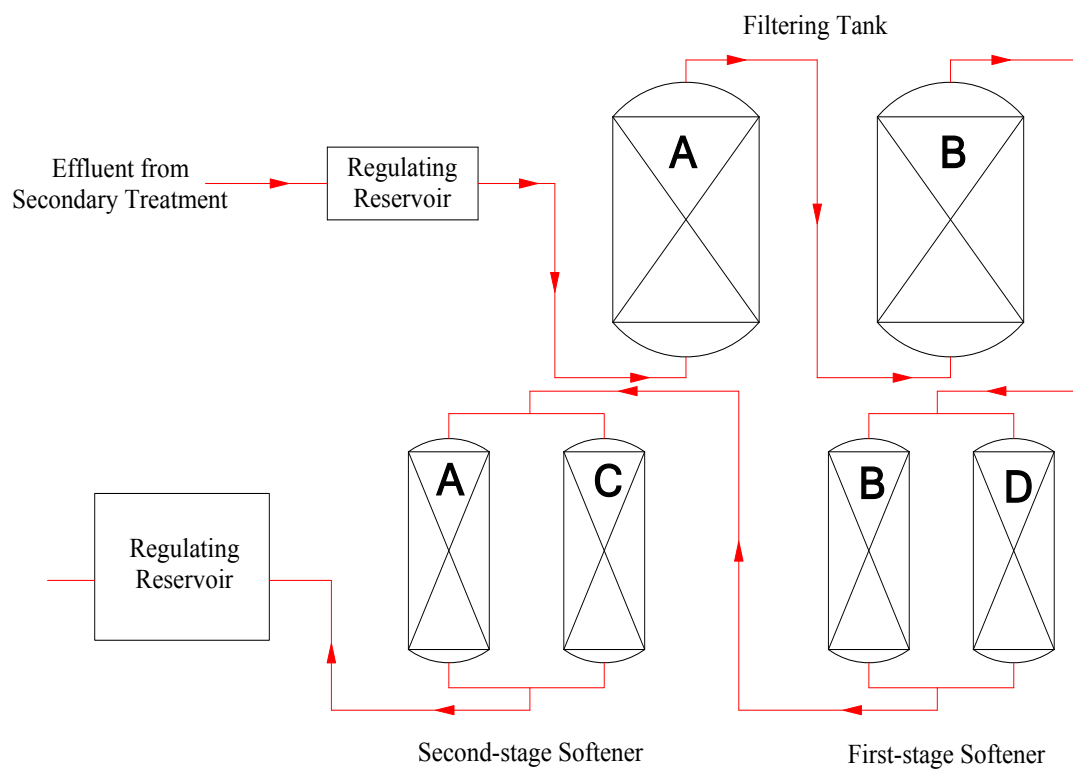

**Figure S2.** Flow diagram of the softening process in the pilot-scale test

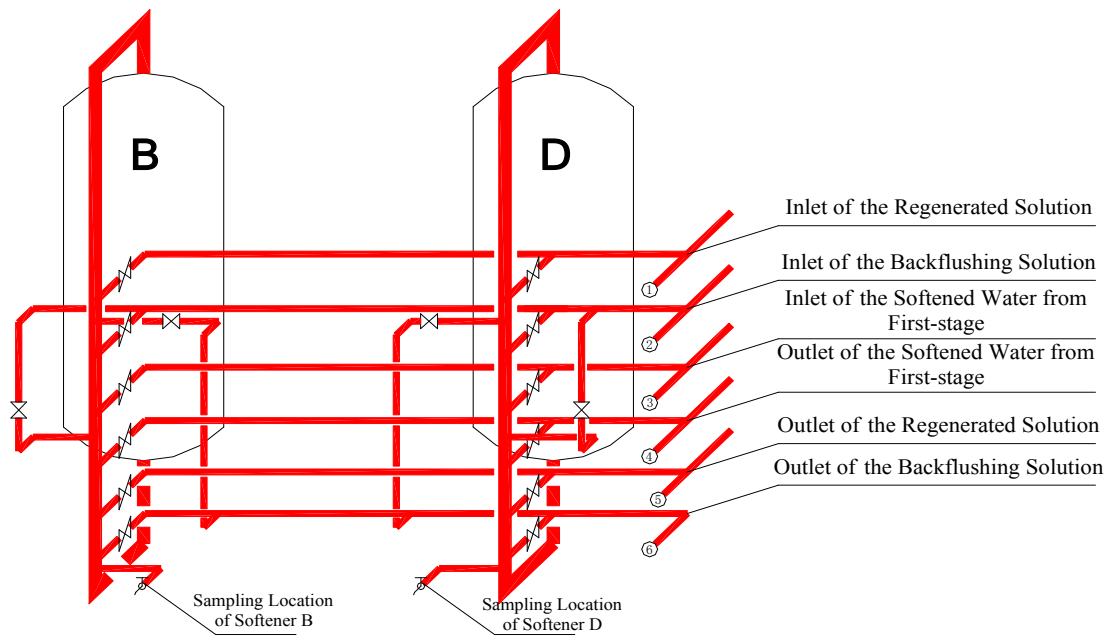

(a)

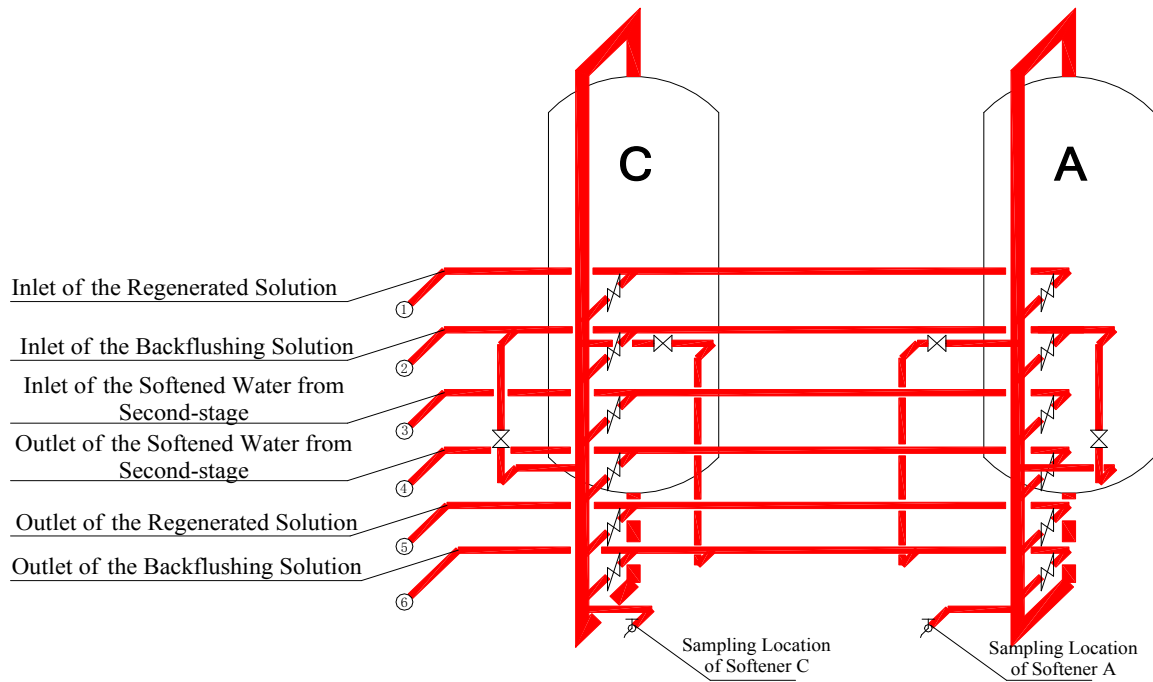

(b)

**Figure S3.** Schematic diagram of the two stage softeners in the pilot-scale test: (a) Schematic diagram of the first-stage softeners; (b) Schematic diagram of the second-stage softeners.

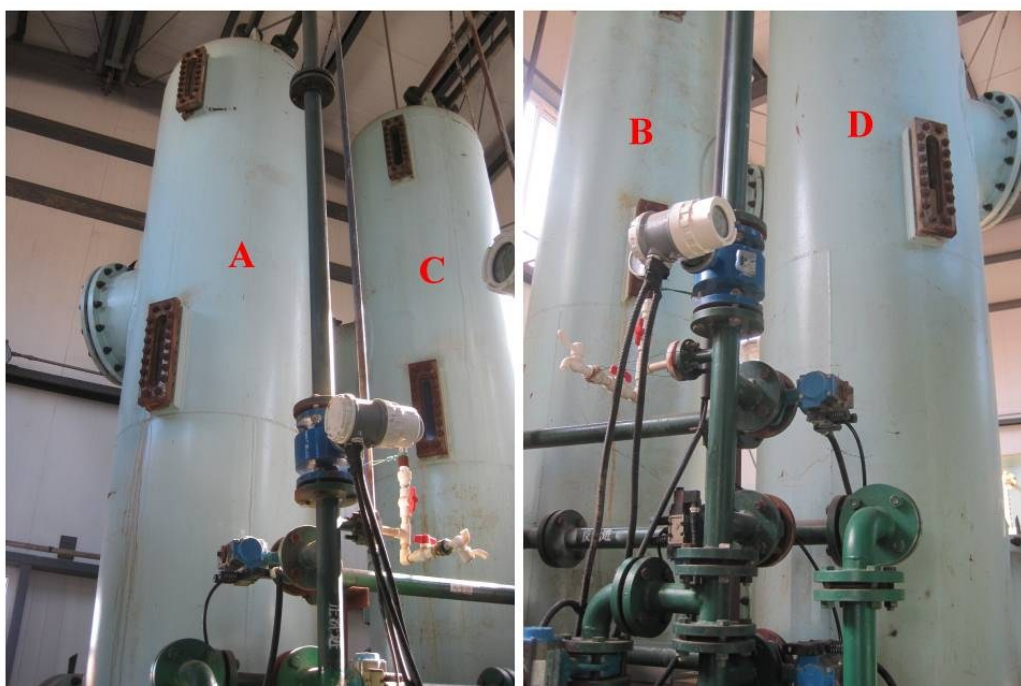

**Figure S4.** Photo of the two stage softeners in the pilot-scale test

**Table S2.** Basic characteristics of the raw oilfield produced water and the effluent from the secondary treatment in the pilot-scale test

|                                            | Raw Oilfield-produced Water |       | Effluent from Secondary Treatment |        |
|--------------------------------------------|-----------------------------|-------|-----------------------------------|--------|
|                                            | Average                     | SD    | Average                           | SD     |
| Oil Content (mg/L)                         | 680                         | ±45   | 6.2                               | ±1.1   |
| Sulfide (mg/L)                             | 43.8                        | ±10.7 | 8.65                              | ±0.03  |
| TOC (mg/L)                                 | 1760                        | ±120  | 127.5                             | ±3.1   |
| UV <sub>254</sub>                          | TH                          | TH    | 6.81                              | ±0.23  |
| pH (25°C)                                  | 8.54                        | ±0.68 | 7.46                              | ±0.41  |
| SS (mg/L)                                  | 1340                        | ±108  | 5                                 | ±2     |
| TDS (mg/L, 25°C)                           | 8000                        | ±500  | 1770                              | ±59    |
| DO (mg/L, 25°C)                            | 2.51                        | ±1.19 | 2.10                              | ±0.15  |
| Ca (mg/L)                                  | 539                         | ±30   | 100                               | ±24    |
| Mg (mg/L)                                  | 128                         | ±15   | 20                                | ±8     |
| Fe (mg/L)                                  | 6.24                        | ±1.31 | 1.6                               | ±0.3   |
| Mn (mg/L)                                  | 0.41                        | ±0.03 | 0.05                              | ±0.002 |
| a SD = Standard Deviation; a TH = Too High |                             |       |                                   |        |

**Table S3.** Basic parameters of the two stage softeners in the pilot-scale test

| Parameters                        | Resin Softeners |         |         |         |
|-----------------------------------|-----------------|---------|---------|---------|
|                                   | B               | D       | A       | C       |
| Mass of the CERs (kg)             | 770             | 770     | 720     | 720     |
| Superficial Liquid Velocity (m/h) | 0.5~0.8         | 0.5~0.8 | 0.5~0.8 | 0.5~0.8 |
| Radius of the Softener (mm)       | 750             | 750     | 750     | 750     |

**Table S4.** Removal rates of SUVA<sub>254</sub> and total hardness by the CERs in the pilot-scale test

| Parameters                                | Effluent from<br>Secondary Treatment | Softened<br>Water | Removal Rate<br>(%) |
|-------------------------------------------|--------------------------------------|-------------------|---------------------|
| SUVA <sub>254</sub> (L/mg C·m)            | 3.20~5.60                            | 2.18~3.24         | 30~60               |
| Total hardness (CaCO <sub>3</sub> , mg/L) | 200~350                              | 0.020~0.080       | 99                  |

**Table S5.** Basic characteristics of the model water

| Sample                                      | HM Content<br>(mg/L) | SUVA <sub>254</sub><br>(L/mg C·m) | UV <sub>254</sub> |          | DOC (mg/L) |          | pH  |
|---------------------------------------------|----------------------|-----------------------------------|-------------------|----------|------------|----------|-----|
|                                             |                      |                                   | AV                | SD       | AV         | SD       |     |
| 0                                           | 0                    | /                                 | /                 | /        | /          | /        | 7.5 |
| 1                                           | 5                    | 4.0                               | 0.102             | ± 0.0042 | 2.510      | ± 0.1480 | 7.3 |
| 2                                           | 10                   | 5.3                               | 0.178             | ± 0.0102 | 3.372      | ± 0.1674 | 7.6 |
| 3                                           | 15                   | 6.2                               | 0.251             | ± 0.0177 | 4.038      | ± 0.1607 | 7.4 |
| 4                                           | 20                   | 6.8                               | 0.347             | ± 0.0321 | 5.080      | ± 0.1908 | 7.3 |
| 5                                           | 25                   | 7.3                               | 0.430             | ± 0.0489 | 5.872      | ± 0.2610 | 7.5 |
| 6                                           | 30                   | 7.6                               | 0.483             | ± 0.0207 | 6.338      | ± 0.1821 | 7.6 |
| a AV=Average Value; a SD=Standard Deviation |                      |                                   |                   |          |            |          |     |

**Table S6.** Ca  $Q_e$  of CERs with different dosages of HM

| Sample                                    | HM Content (mg/L) | $Q_e$ (mg/g) | Standard Deviation |
|-------------------------------------------|-------------------|--------------|--------------------|
| 0                                         | 0                 | 189.21       | $\pm 3.7319$       |
| 1                                         | 5                 | 206.46       | $\pm 2.7706$       |
| 2                                         | 10                | 209.22       | $\pm 1.3972$       |
| 3                                         | 15                | 219.80       | $\pm 8.7919$       |
| 4                                         | 20                | 221.23       | $\pm 6.2515$       |
| 5                                         | 25                | 232.86       | $\pm 5.7251$       |
| 6                                         | 30                | 246.32       | $\pm 7.4879$       |
| a $Q_e$ = Equilibrium adsorption quantity |                   |              |                    |

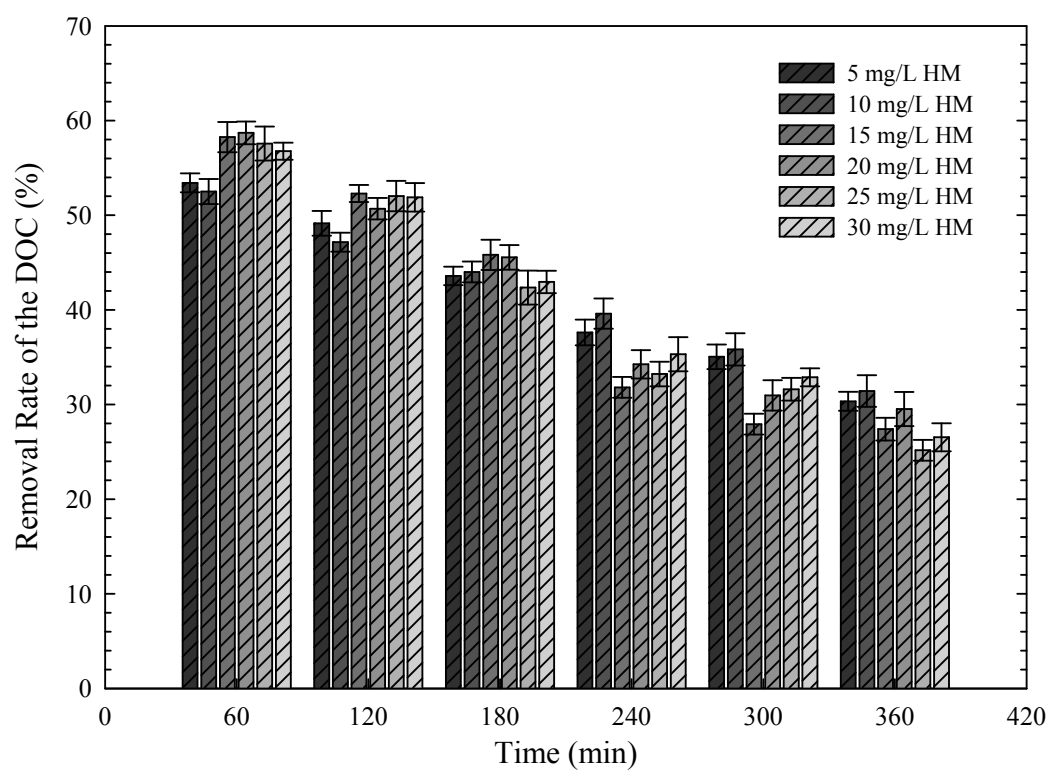

**Figure S5.** Removal rates of the DOC of the HM with different dosages and time by CERs

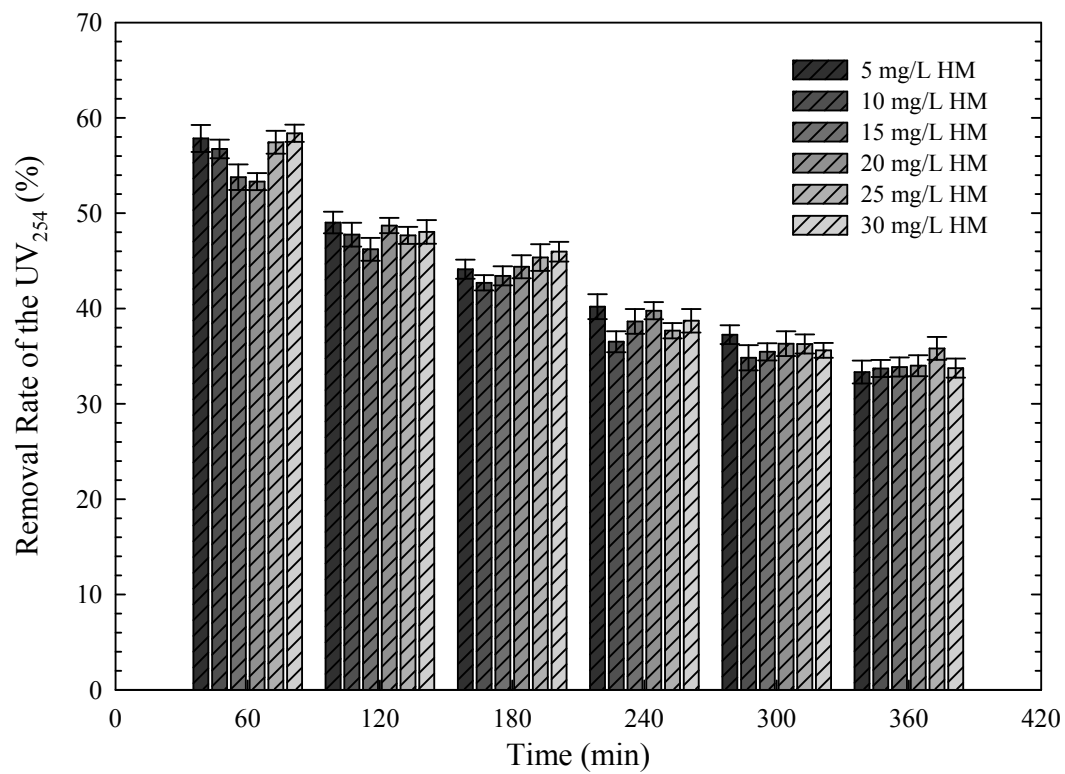

(a)

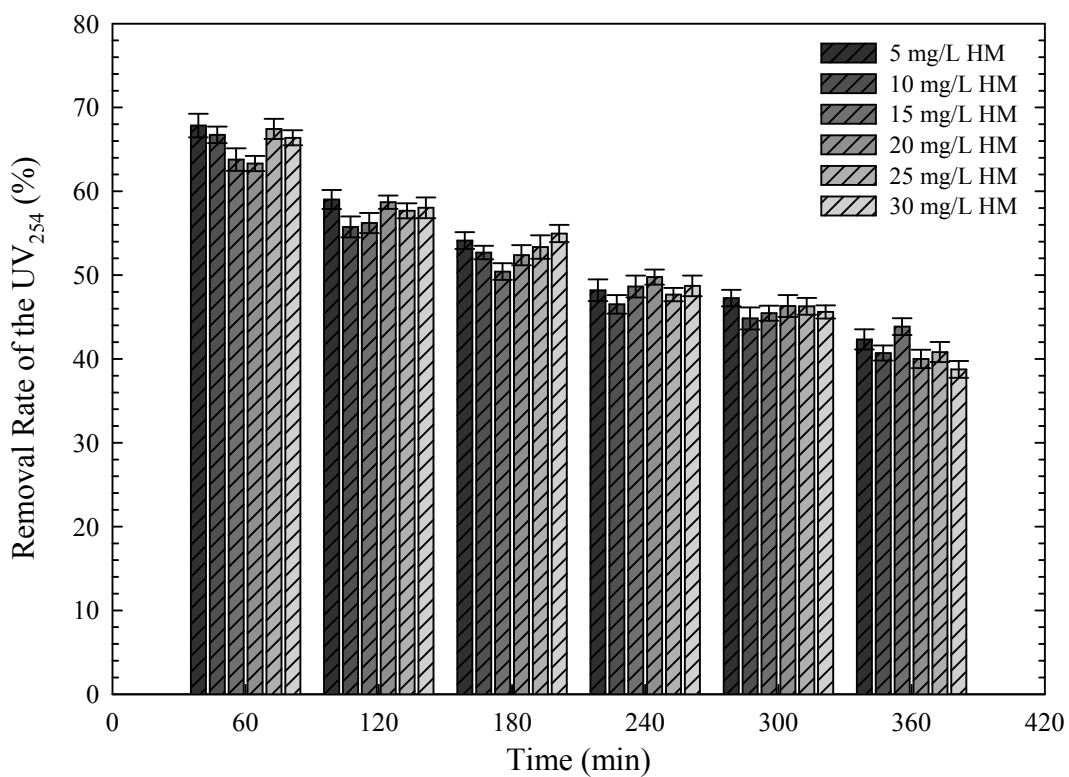

(b)

**Figure S6.** Removal rates of the UV<sub>254</sub> of the HM with different dosages and time by CERs:

(a) the SLV was 1.0 ± 0.2 m/h; (b) the SLV was 0.5 ± 0.2 m/h.

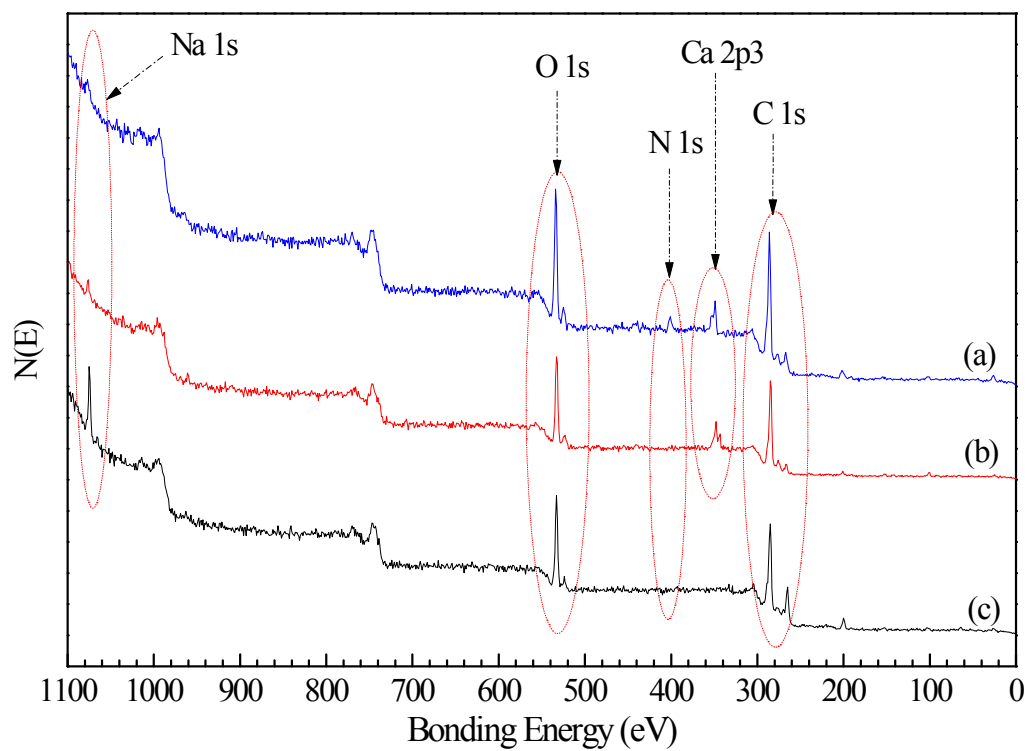

**Figure S7.** XPS survey scans of CER-HM/Ca (a), CER-Ca (b), and CER-Na (c)

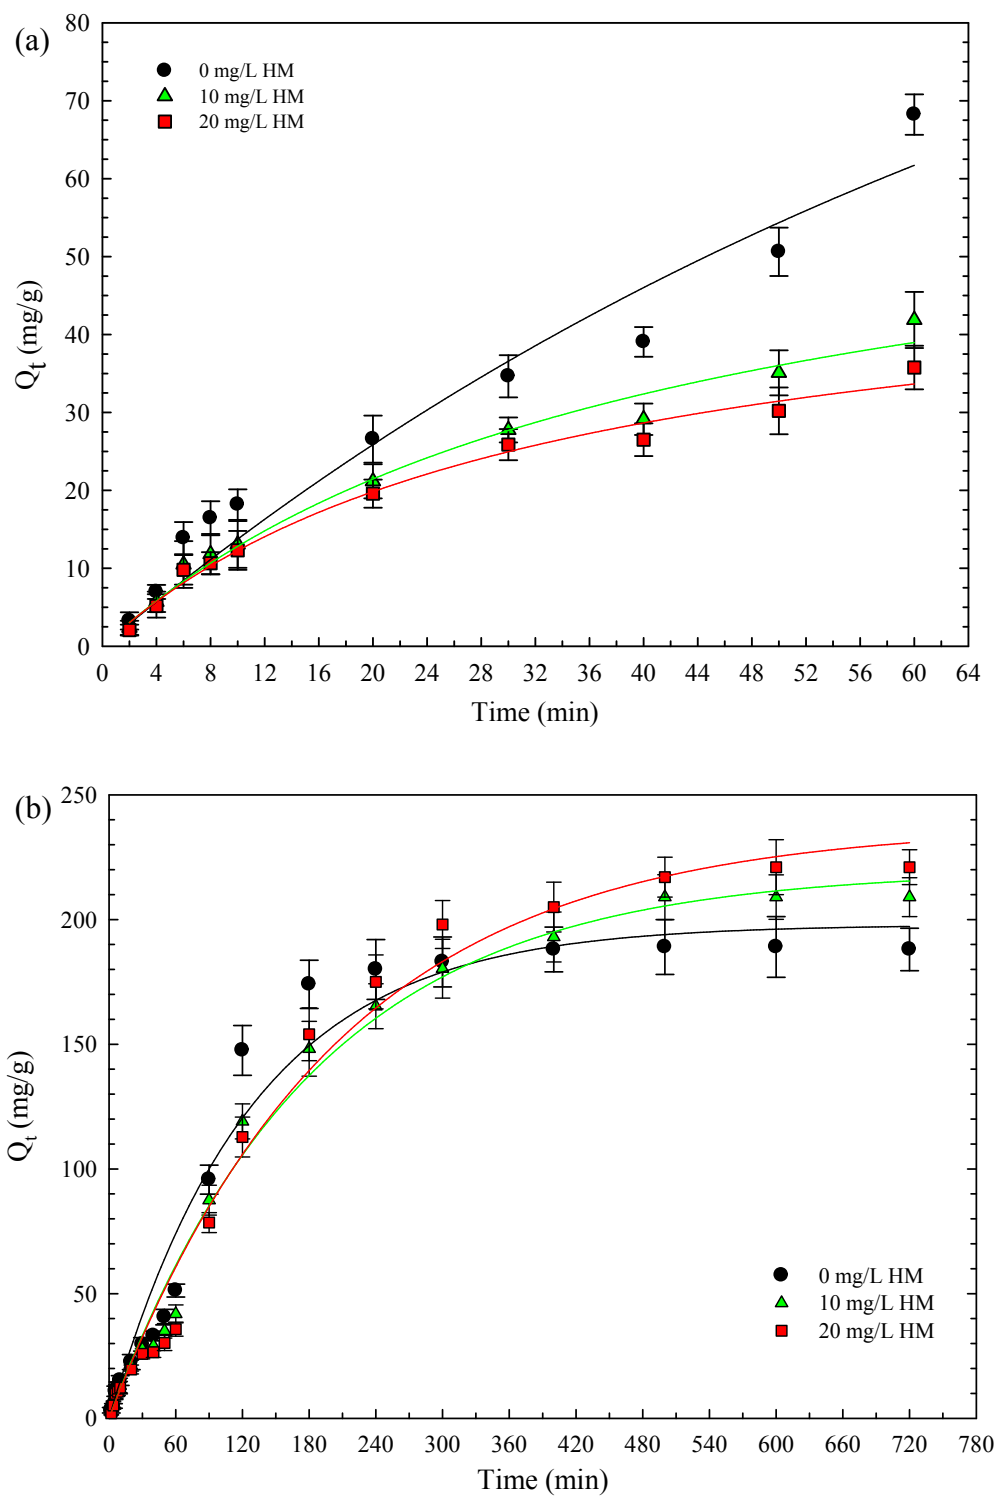

**Figure S8.** Kinetics of Ca adsorption with different HM dosages on resins: (a) the kinetics of Ca adsorption at initial stage (0~60 mins); (b) the kinetics of Ca adsorption at whole stage (0~720 mins).

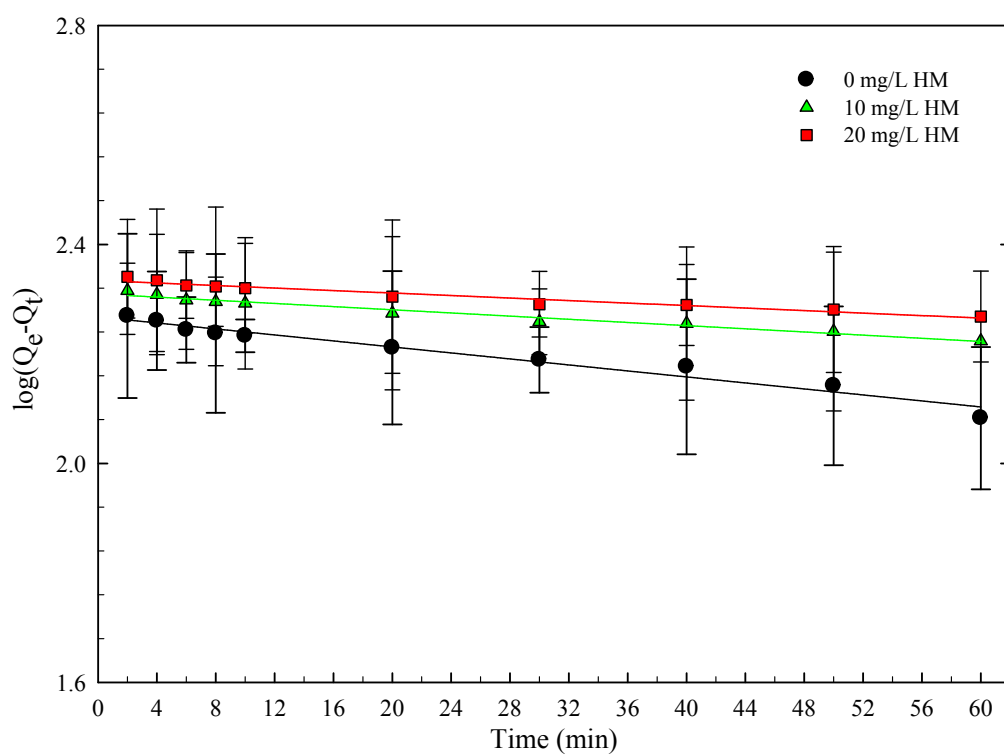

(a)

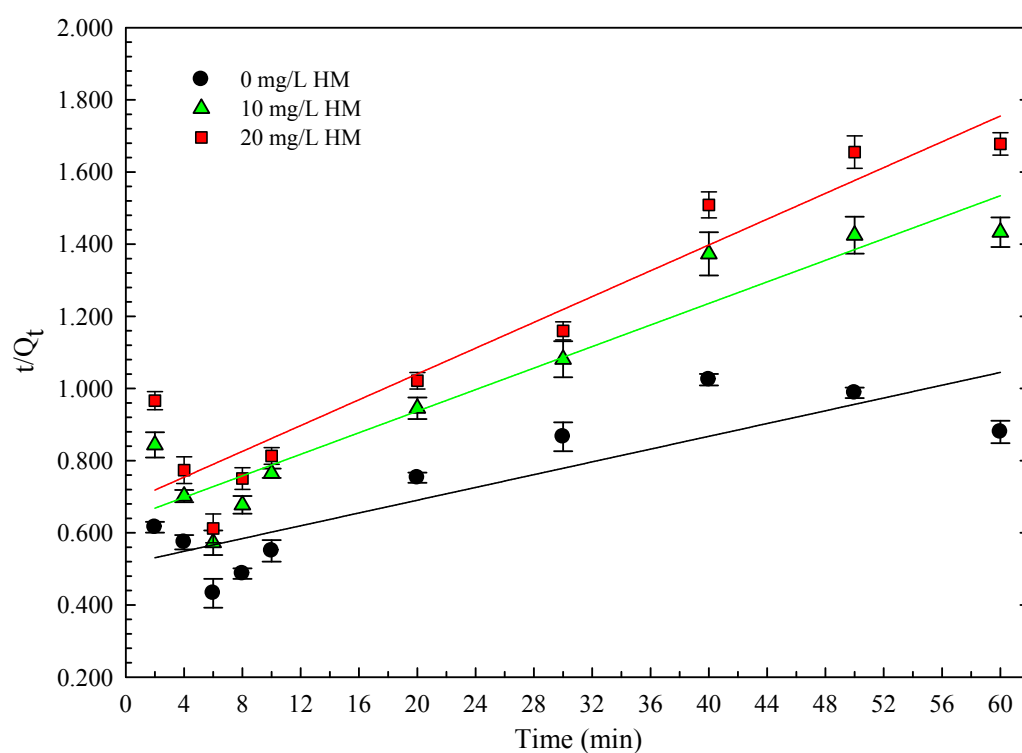

(b)

**Figure S9.** The fitting curves for adsorption of Ca ions at initial stage (0-60 mins): (a) the Pseudo-first-order fitting; (b) the Pseudo-second-order fitting.

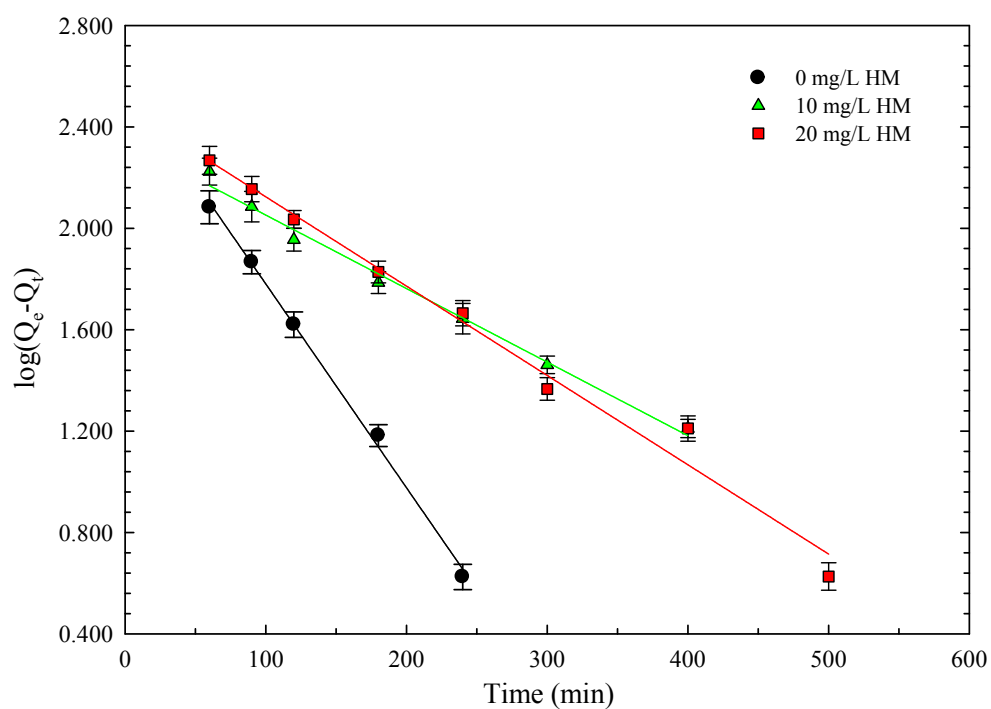

(a)

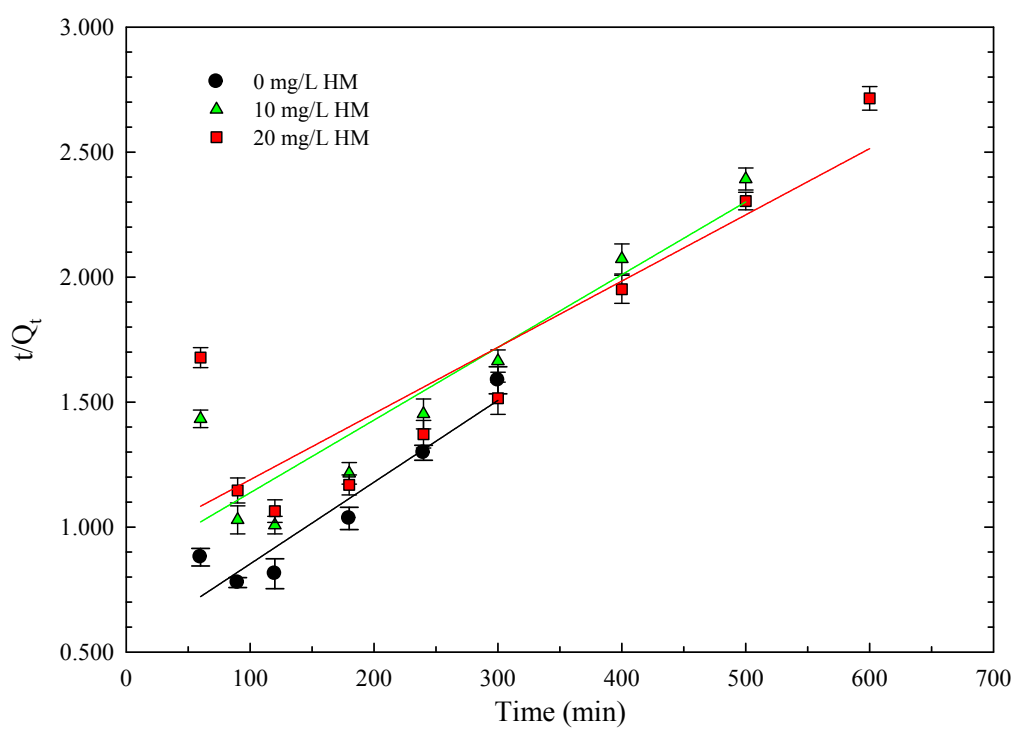

(b)

**Figure S10.** The fitting curves for adsorption of Ca ions after 60-min of adsorption: (a) the Pseudo-first-order fitting; (b) the Pseudo-second-order fitting.
